# Supplementary material for: Investigation and Optimization of Mxene Functionalized Mesoporous Titania Films as Efficient Photoelectrodes
Source: MDPI journal article supplement (doi:10.3390/ma14216292), 2021-10-22
Supplement: s1 [file s1]

Supporting Information

# Investigation and Optimization of Mxene functionalized Mesoporous Titania Films as Efficient Photoelectrodes

Anum Iqbal<sup>1</sup> and Nasser M. Hamdan<sup>2,\*</sup>

<sup>1</sup>Material science and Engineering Program, The American University of Sharjah

<sup>2</sup>Physics Department,

The American University of Sharjah, Sharjah 26666, United Arab Emirates;

\*Corresponding author Email: (nhamdan@aus.edu)

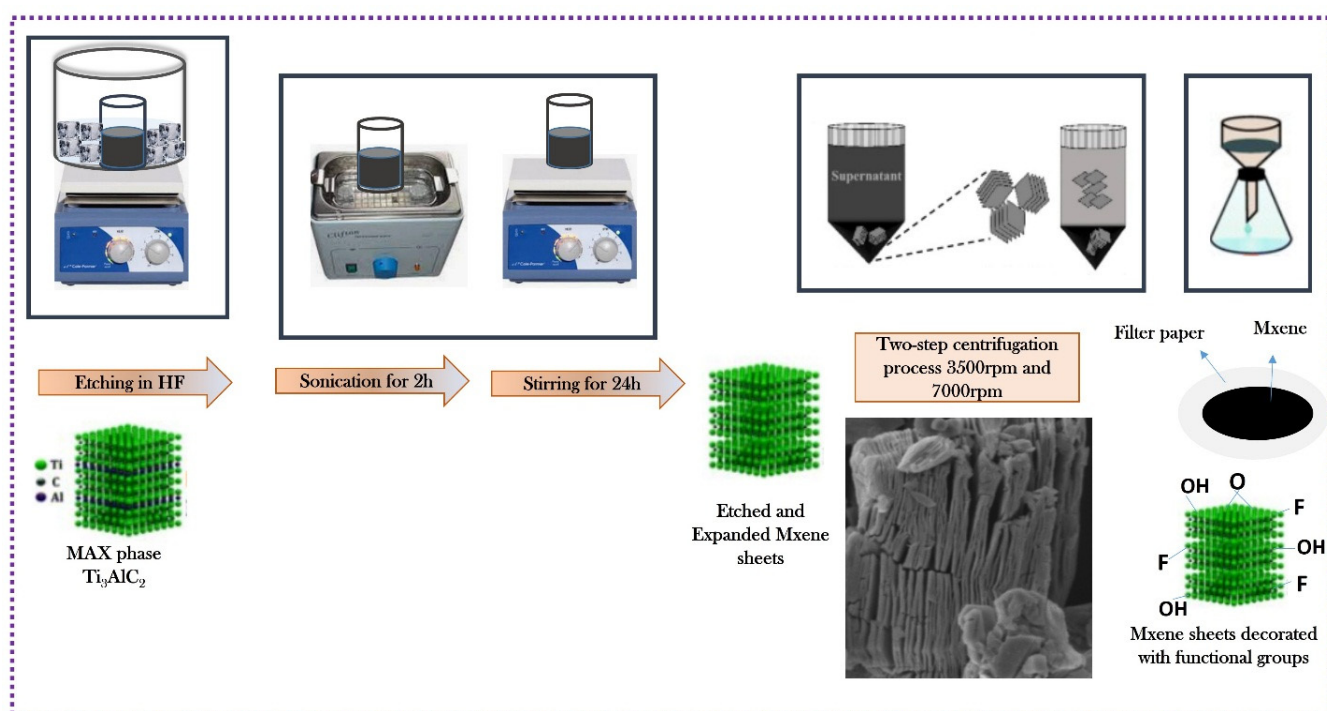

**Figure S1.** Schematic representation of the stages involved in the synthesis of Mxene sheets.

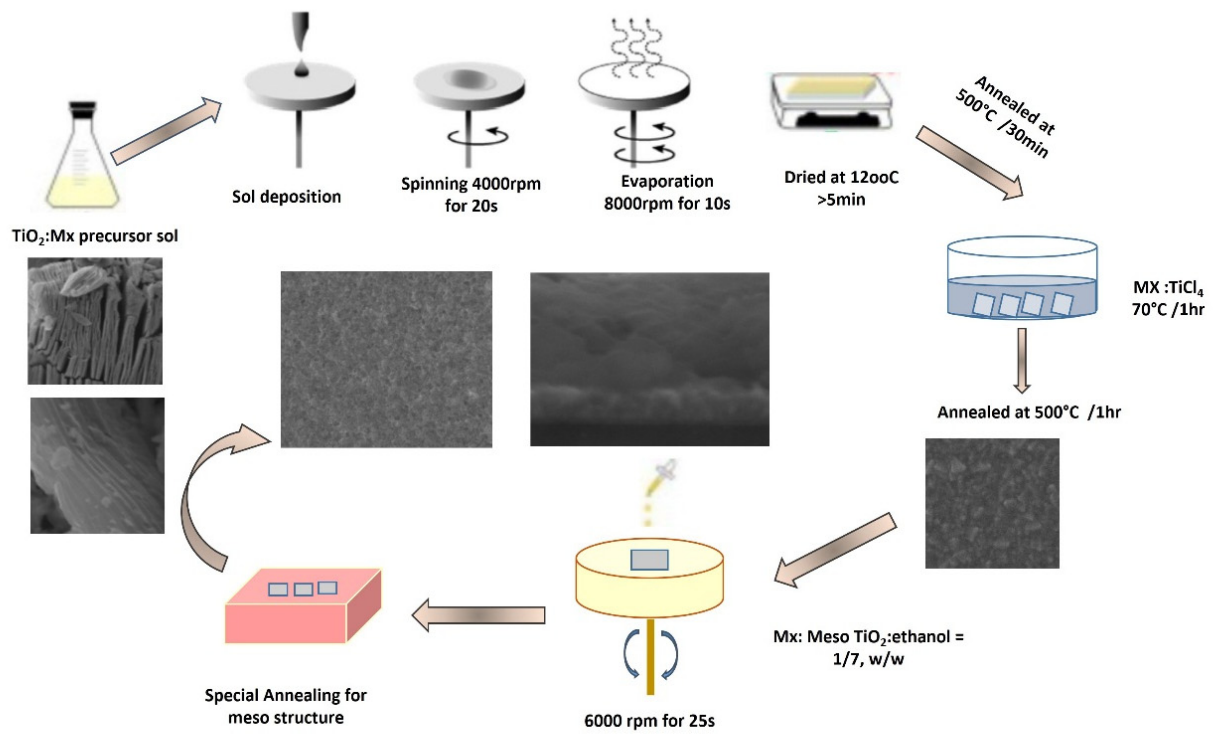

**Figure S2.** Stages involved in the fabrication of Mxene modified Mesoporous Titania Photoelectrodes.

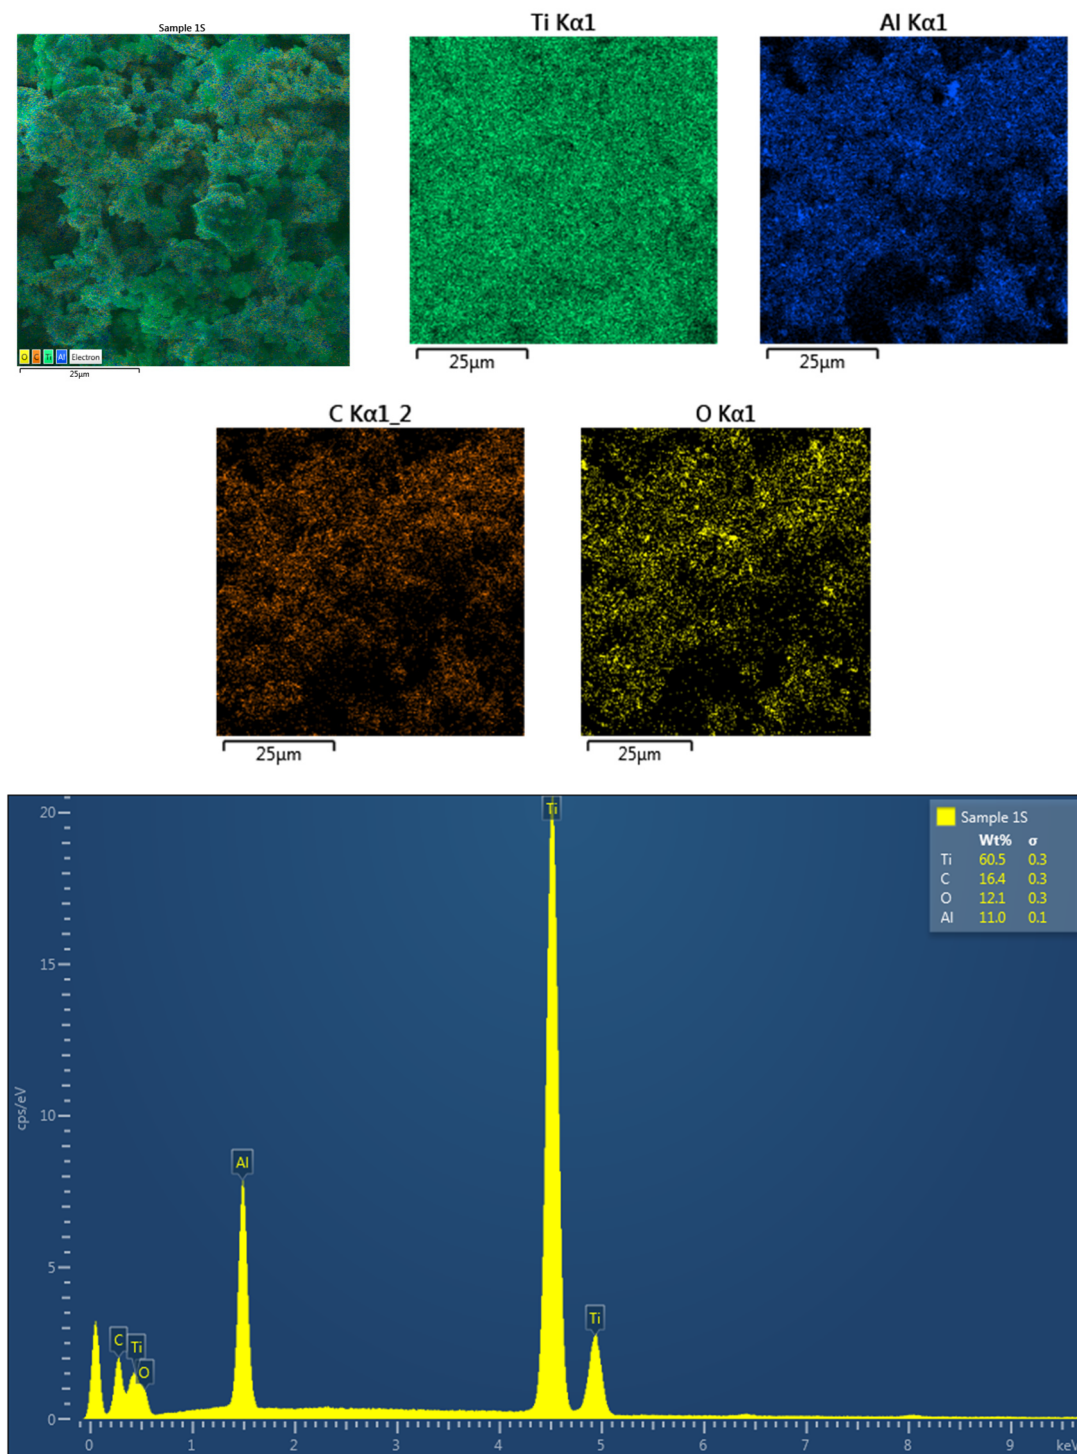

**Figure S3.** The EDS spectra and colorful elemental maps of  $\text{Ti}_3\text{AlC}_2$  precursor exhibit the contents of Ti, C and Al elements indicating good purity level of the utilized  $\text{Ti}_3\text{AlC}_2$  MAX phase as precursor.

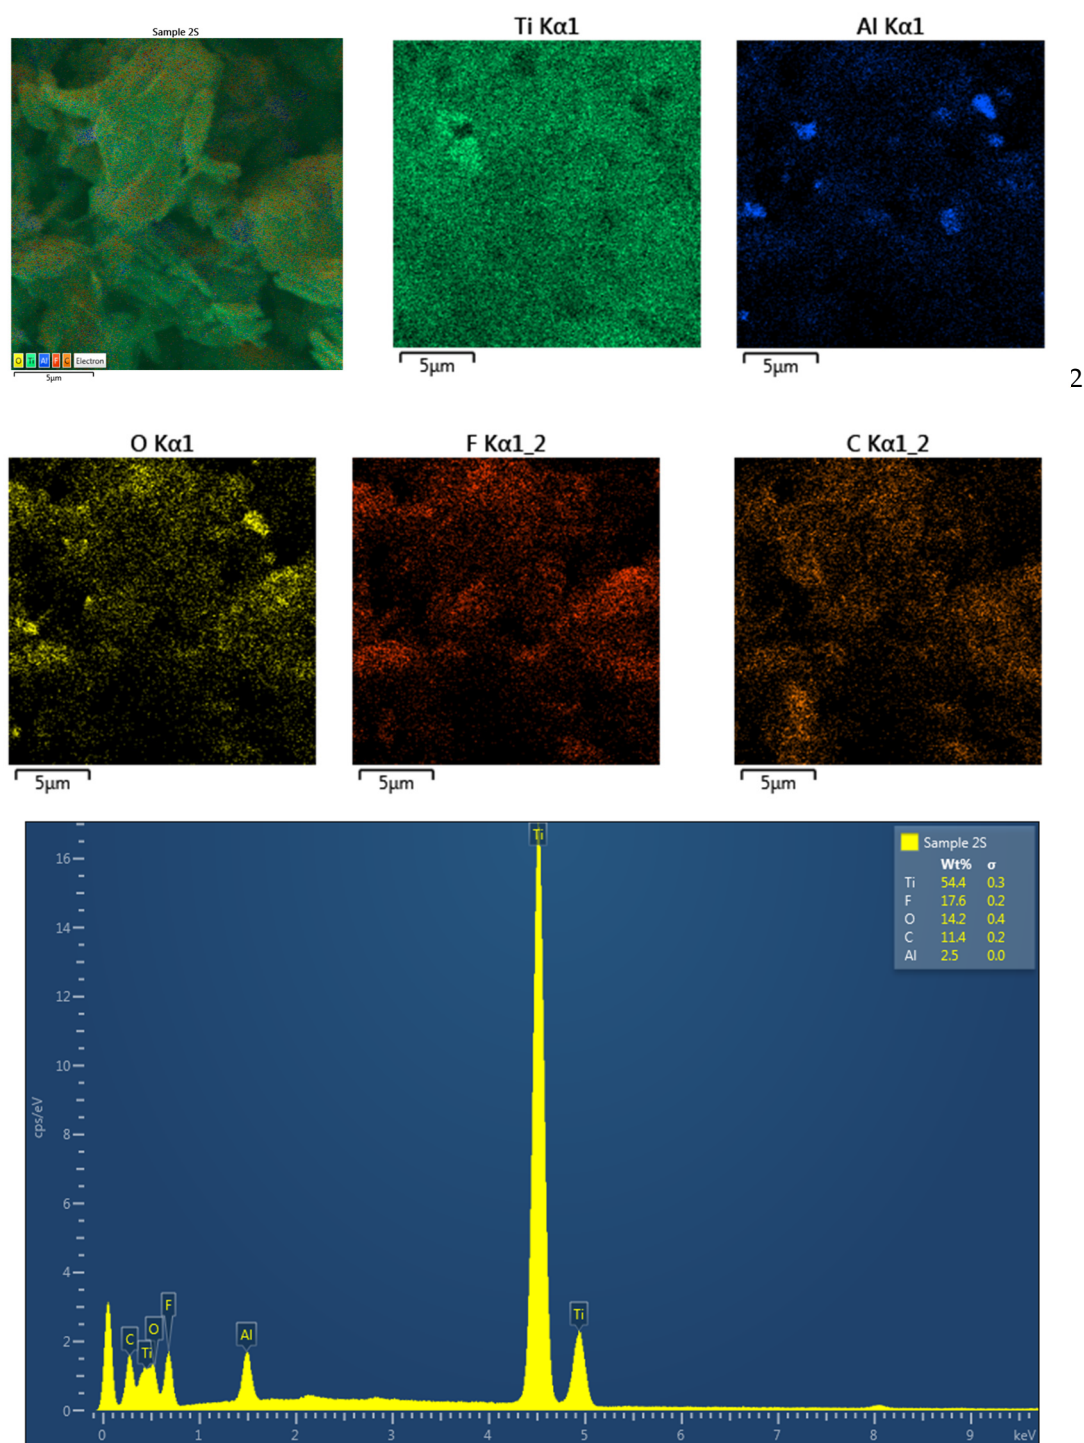

2

**Figure S4.** Exfoliated and lamellar  $\text{Ti}_3\text{C}_2$  post HF etching of  $\text{Ti}_3\text{AlC}_2$  in a controlled environment, with Ti, C, O and F as the main components indicated in the elemental maps and EDS spectra. The presence of few Al spots indicates the presence of unreacted  $\text{AlF}_3$ , which was also confirmed from XRD results shown in fig 1 of the manuscript.

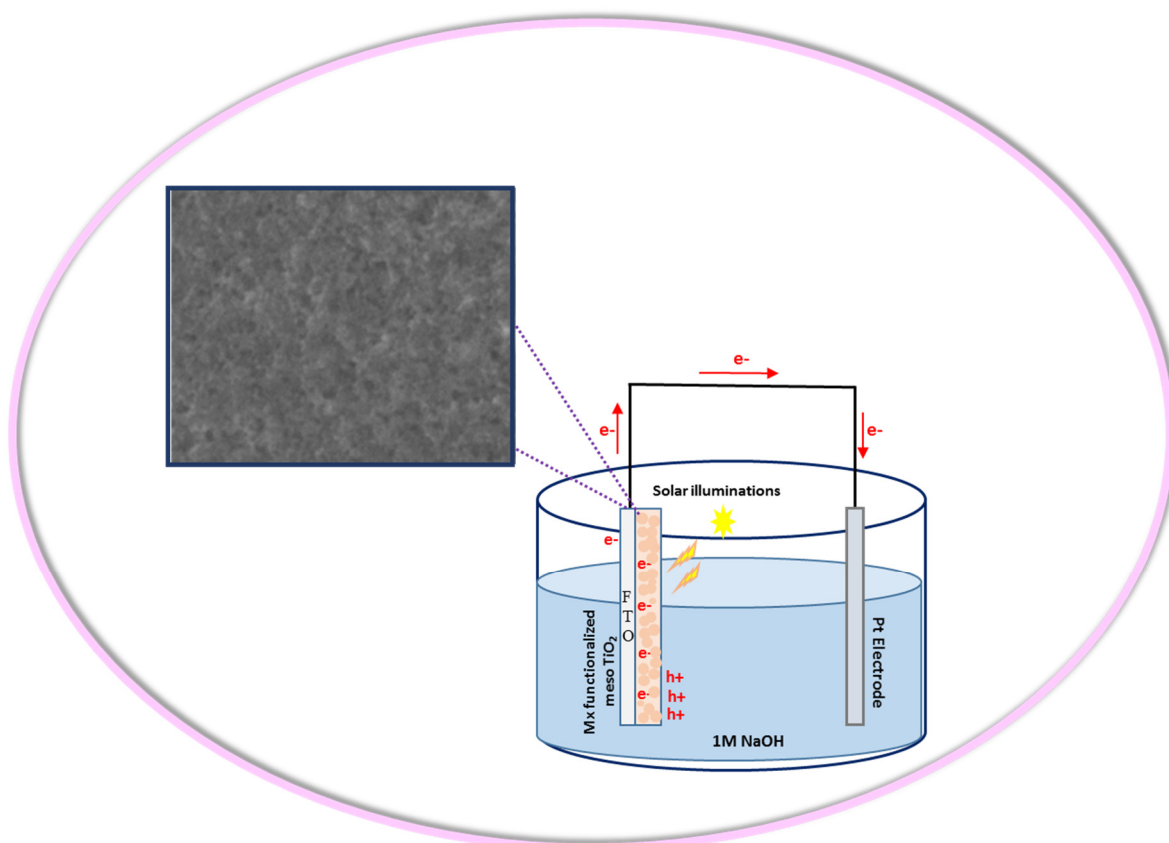

**Figure S5.** A pictorial view of Mxene functionalized mesoporous  $\text{TiO}_2$  layer working as photoelectrode under light illuminations.
